# Supplementary material
Source: Research Square preprint supplement (doi:10.21203/rs.3.rs-9926562/v1)
Supplement: Supplementary file 1 [file 105ebc4ef05dfee985ee7166.docx]

**Title:** Physics-Informed Machine Learning for Structural Stability and Bandgap Engineering in Lead-Free Sn–Ge Perovskites for Photovoltaic Applications

**Author:** Rashmi Singh

**Affiliation:** Department of Physics, GLA University, Mathura, India.

**Description of Supplementary Files:**

- **ESI_Dataset_S1_Machine_Learning_Data:** This file contains the complete screening dataset of 1,000+ lead-free perovskite compositions, including their structural descriptors (Tolerance Factor, Octahedral Factor) and predicted bandgap values.
- **ESI_Table_S2_Predicted_Stable_Compositions:** List of the top Stable Candidates identified within the Novelty Zone, featuring optimized Sn-Ge ratios for high-performance photovoltaics.
