# Supplementary material
Source: Research Square preprint supplement (doi:10.21203/rs.3.rs-9926562/v1)
Supplement: Supplementary file 2 [file 474de59e3facc8259d7bbe71.xlsx]

## Sheet: novel_perovskite_space
Cs Fraction (%)	Sn Fraction (%)	Tolerance_Factor	Bandgap (eV)	Stability
0.520649	0.900899	1.00415	1.385	Low
0.638974	0.141099	0.979411	1.85002	High
0.816252	0.161876	0.95825	1.82086	High
0.383372	0.922876	1.02123	1.36121	Low
0.808391	0.590841	0.964864	1.53904	High
0.302755	0.357404	1.02309	1.64337	Low
0.422198	0.960101	1.01701	1.37197	Low
0.780417	0.073544	0.961422	1.85726	High
0.201711	0.451282	1.03667	1.61364	Low
0.535541	0.0826115	0.991123	1.84857	Low
0.0894964	0.97372	1.05789	1.34563	Low
0.965786	0.797303	0.948412	1.45354	High
0.230056	0.384804	1.03229	1.67455	Low
0.379828	0.867166	1.02088	1.37648	Low
0.577461	0.0848377	0.986089	1.85939	Low
0.499466	0.216272	0.997302	1.76243	Low
0.51211	0.668836	1.00198	1.45088	Low
0.302642	0.419021	1.02397	1.63036	Low
0.824708	0.0646756	0.955956	1.88198	High
0.633102	0.804515	0.989096	1.4608	Low
0.575626	0.0445653	0.985768	1.846	Low
0.814471	0.752574	0.966275	1.47434	High
0.0179561	0.386628	1.05804	1.69198	Low
0.452763	0.0268927	1.00036	1.86575	Low
0.692182	0.281814	0.974854	1.69181	High
0.978685	0.316247	0.940593	1.75276	High
0.167357	0.0768104	1.03552	1.82573	Low
0.60964	0.35066	0.985783	1.72032	Low
0.149813	0.184904	1.03917	1.78775	Low
0.462508	0.935437	1.01174	1.32967	Low
0.197892	0.309111	1.03512	1.70849	Low
0.841827	0.473919	0.959253	1.65216	High
0.718055	0.510642	0.974777	1.63678	High
0.989633	0.107275	0.936583	1.80732	High
0.574013	0.458627	0.991571	1.60912	Low
0.00338304	0.927609	1.06774	1.29376	Low
0.962371	0.170403	0.940689	1.78521	High
0.0869519	0.561416	1.0522	1.54549	Low
0.663088	0.797933	0.985348	1.43779	Low
0.750262	0.340356	0.968596	1.72628	High
0.479572	0.211357	0.999643	1.76458	Low
0.279565	0.557405	1.02872	1.55875	Low
0.594908	0.0339715	0.983297	1.89647	Low
0.903999	0.328421	0.949803	1.72419	High
0.627139	0.242691	0.982206	1.76691	Low
0.726042	0.269362	0.970587	1.77517	High
0.613655	0.655463	0.989433	1.54877	Low
0.477525	0.341294	1.00167	1.64634	Low
0.0384361	0.57759	1.05833	1.56441	Low
0.199955	0.263699	1.03422	1.73663	Low
0.716537	0.250903	0.971492	1.71054	High
0.245097	0.0618794	1.02592	1.90067	Low
0.456413	0.54473	1.00704	1.54728	Low
0.246968	0.106286	1.02632	1.85526	Low
0.629164	0.0948139	0.979976	1.81576	High
0.253643	0.336226	1.02874	1.67382	Low
0.915314	0.970758	0.95686	1.28341	High
0.0546728	0.486451	1.05504	1.5681	Low
0.84487	0.637351	0.961041	1.54849	High
0.999861	0.294963	0.937753	1.75731	High
0.0151508	0.194552	1.0556	1.74089	Low
0.25763	0.876887	1.03594	1.35641	Low
0.970632	0.850323	0.948515	1.34795	High
0.0512972	0.909675	1.06162	1.34133	Low
0.704298	0.393324	0.974876	1.63386	High
0.549976	0.988374	1.00178	1.28959	Low
0.66828	0.436866	0.979831	1.61227	High
0.191246	0.561432	1.03952	1.61117	Low
0.937485	0.994326	0.95446	1.30115	High
0.378162	0.728425	1.01913	1.4585	Low
0.789311	0.0103873	0.959519	1.86364	High
0.96798	0.889092	0.949347	1.34097	High
0.968865	0.896339	0.949334	1.38034	High
0.758979	0.315568	0.96721	1.73871	High
0.241672	0.0518605	1.02619	1.88404	Low
0.873454	0.738789	0.958901	1.41624	High
0.58106	0.525467	0.991626	1.56671	Low
0.660266	0.142299	0.976852	1.78051	High
0.799901	0.906503	0.970111	1.37832	High
0.595388	0.420387	0.988456	1.6548	Low
0.521541	0.303417	0.995819	1.67797	Low
0.114045	0.349719	1.04586	1.70787	Low
0.986015	0.553903	0.942777	1.51874	High
0.306829	0.975685	1.03134	1.30636	Low
0.762147	0.320984	0.966898	1.75248	High
0.00551094	0.633037	1.06315	1.51395	Low
0.572933	0.429984	0.991312	1.63443	Low
0.117956	0.505059	1.04762	1.59197	Low
0.011491	0.0487956	1.05394	1.89704	Low
0.139642	0.583319	1.04611	1.54305	Low
0.489177	0.634166	1.00429	1.51582	Low
0.71835	0.631033	0.976357	1.48646	High
0.0554985	0.826934	1.0599	1.37065	Low
0.938909	0.0403103	0.94185	1.8426	High
0.164312	0.364207	1.03997	1.72087	Low
0.74053	0.768232	0.9755	1.4017	High
0.614339	0.393293	0.985789	1.65714	Low
0.581599	0.297868	0.988467	1.71162	Low
0.751728	0.646437	0.972501	1.54314	High
0.396119	0.485435	1.01355	1.58262	Low
0.687505	0.945346	0.984372	1.31135	Low
0.78835	0.187446	0.961961	1.74765	High
0.63304	0.68945	0.987535	1.49825	Low
0.401722	0.0977271	1.0075	1.79473	Low
0.923577	0.18028	0.945509	1.76556	High
0.902695	0.446747	0.951505	1.64658	High
0.213256	0.438975	1.0351	1.67967	Low
0.957046	0.681013	0.947956	1.49275	High
0.993623	0.12017	0.936266	1.86654	High
0.516009	0.848696	1.00399	1.43919	Low
0.0606435	0.222266	1.0505	1.72199	Low
0.434361	0.394619	1.00764	1.68483	Low
0.589885	0.731253	0.993364	1.42296	Low
0.853298	0.546942	0.958821	1.53979	High
0.750395	0.974543	0.977079	1.29031	High
0.800114	0.587713	0.965829	1.56849	High
0.915223	0.171161	0.946401	1.8455	High
0.463525	0.899453	1.01111	1.38384	Low
0.783675	0.851197	0.971351	1.35648	High
0.873941	0.596177	0.95696	1.54715	High
0.522103	0.528511	0.998833	1.56845	Low
0.978402	0.944445	0.9488	1.29552	High
0.551908	0.461592	0.994296	1.64596	Low
0.462419	0.58756	1.0069	1.55437	Low
0.818091	0.413336	0.961335	1.60358	High
0.681465	0.929914	0.9849	1.34273	Low
0.644193	0.422694	0.982564	1.59876	Low
0.262497	0.825082	1.03461	1.41825	Low
0.949783	0.0433256	0.940576	1.84082	High
0.298945	0.415446	1.02436	1.64141	Low
0.92026	0.299555	0.947457	1.74286	High
0.572956	0.572737	0.993256	1.58516	Low
0.908249	0.22861	0.94799	1.71499	High
0.0899198	0.467843	1.05049	1.58506	Low
0.522848	0.720695	1.00139	1.496	Low
0.327435	0.214382	1.0181	1.75836	Low
0.182816	0.914389	1.04562	1.36388	Low
0.129181	0.0335032	1.03951	1.91456	Low
0.827314	0.494026	0.961281	1.61798	High
0.444623	0.282477	1.00485	1.76273	Low
0.347084	0.325032	1.01726	1.70773	Low
0.436781	0.134897	1.00377	1.85288	Low
0.950928	0.183991	0.942248	1.78023	High
0.890179	0.411267	0.95256	1.6488	High
0.877198	0.81217	0.959416	1.43725	High
0.927165	0.390627	0.947803	1.70091	High
0.0379525	0.413198	1.056	1.64422	Low
0.0211535	0.0590176	1.05292	1.89499	Low
0.612976	0.0444561	0.981257	1.86987	Low
0.687409	0.839635	0.982947	1.42904	Low
0.699724	0.0623337	0.97102	1.84967	High
0.583677	0.603661	0.992375	1.55483	Low
0.811154	0.574003	0.964304	1.56745	High
0.340194	0.89258	1.02608	1.38884	Low
0.755369	0.569909	0.971034	1.60782	High
0.898827	0.0596742	0.94694	1.83467	High
0.193321	0.647777	1.0405	1.50489	Low
0.75749	0.848208	0.974507	1.40746	High
0.249022	0.425572	1.03057	1.61708	Low
0.54968	0.173781	0.990649	1.80442	Low
0.099293	0.110633	1.04422	1.80076	Low
0.175892	0.399385	1.03907	1.67444	Low
0.496864	0.506554	1.0016	1.56997	Low
0.811203	0.655628	0.965382	1.5212	High
0.745244	0.373182	0.969641	1.66916	High
0.295983	0.855237	1.03095	1.35286	Low
0.065689	0.884375	1.05949	1.39225	Low
0.816795	0.668742	0.964876	1.49088	High
0.419428	0.0106102	1.00416	1.86515	Low
0.354009	0.153289	1.01403	1.75946	Low
0.105943	0.379537	1.04727	1.64704	Low
0.805794	0.7877	0.967802	1.43704	High
0.123777	0.375325	1.04505	1.67889	Low
0.664402	0.58935	0.982359	1.57681	Low
0.842908	0.498331	0.959443	1.61007	High
0.913104	0.659406	0.953025	1.46418	High
0.259036	0.891479	1.03598	1.35925	Low
0.342337	0.644509	1.02231	1.4728	Low
0.210014	0.453455	1.0357	1.58441	Low
0.57637	0.0575485	0.985853	1.86333	Low
0.918811	0.760485	0.953658	1.43456	High
0.00709683	0.882861	1.06663	1.40571	Low
0.851977	0.322182	0.956027	1.66148	High
0.0556688	0.800115	1.05948	1.46926	Low
0.678626	0.922039	0.98514	1.33232	Low
0.0613134	0.748663	1.05804	1.4052	Low
0.157883	0.564806	1.04362	1.52956	Low
0.503079	0.789404	1.00475	1.41189	Low
0.82385	0.0963989	0.956474	1.86934	High
0.935495	0.585713	0.949335	1.52075	High
0.20071	0.0215807	1.03071	1.9143	Low
0.904055	0.316178	0.949637	1.73059	High
0.409364	0.112382	1.00677	1.84759	Low
0.816164	0.691939	0.965261	1.44839	High
0.956265	0.35783	0.943848	1.72893	High
0.664951	0.860757	0.985976	1.38203	Low
0.395947	0.243232	1.0102	1.71814	Low
0.923291	0.422952	0.948694	1.68266	High
0.344022	0.138057	1.01503	1.84429	Low
0.66325	0.382829	0.979715	1.6866	High
0.163404	0.164027	1.03723	1.83528	Low
0.876818	0.254928	0.952138	1.79018	High
0.419661	0.181885	1.00649	1.78655	Low
0.15724	0.974433	1.04962	1.29103	Low
0.0987892	0.773357	1.05383	1.45214	Low
0.157644	0.0643719	1.03652	1.85264	Low
0.903751	0.310845	0.949604	1.74106	High
0.705973	0.0403569	0.969974	1.84038	High
0.176571	0.309372	1.0377	1.69956	Low
0.387017	0.06934	1.00888	1.82662	Low
0.628319	0.990828	0.992231	1.32437	Low
0.90874	0.913678	0.956908	1.31885	High
0.520564	0.618363	1.00026	1.52708	Low
0.581267	0.505429	0.991328	1.56752	Low
0.217044	0.578279	1.03662	1.52605	Low
0.898115	0.601109	0.954084	1.57591	High
0.779917	0.122396	0.962124	1.83885	High
0.390287	0.598438	1.01583	1.54781	Low
0.934719	0.00667359	0.941923	1.89042	High
0.926967	0.630912	0.950964	1.54198	High
0.925058	0.28413	0.946675	1.72324	High
0.542872	0.309183	0.993313	1.69868	Low
0.280547	0.161241	1.02303	1.78891	Low
0.262035	0.780263	1.03402	1.40548	Low
0.891666	0.0264538	0.947375	1.92719	High
0.51137	0.3539	0.997742	1.6685	Low
0.626157	0.446523	0.985075	1.65514	Low
0.462823	0.511594	1.0058	1.60478	Low
0.604625	0.825455	0.992857	1.36441	Low
0.257335	0.198063	1.02635	1.73182	Low
0.897894	0.139374	0.948085	1.78888	High
0.613983	0.7809	0.991106	1.38544	Low
0.663151	0.993665	0.988009	1.28671	Low
0.683332	0.0262594	0.97252	1.84611	High
0.174079	0.57144	1.04175	1.5219	Low
0.935863	0.0499599	0.942342	1.88943	High
0.703375	0.193786	0.972325	1.7667	High
0.668221	0.247769	0.977301	1.75595	High
0.803615	0.127728	0.95933	1.79716	High
0.221945	0.320252	1.03236	1.72415	Low
0.473818	0.248206	1.00084	1.75637	Low
0.612608	0.347211	0.985376	1.67315	Low
0.678773	0.197214	0.975348	1.80925	High
0.424342	0.625503	1.01207	1.50847	Low
0.392195	0.149732	1.00937	1.78584	Low
0.782233	0.966509	0.973077	1.31033	High
0.825224	0.784946	0.965395	1.3814	High
0.844259	0.87752	0.964305	1.38451	High
0.0127689	0.0178264	1.05334	1.84881	Low
0.914096	0.68486	0.953238	1.49057	High
0.380535	0.88435	1.02104	1.3812	Low
0.233638	0.296816	1.03061	1.67822	Low
0.620591	0.812703	0.990734	1.41117	Low
0.464822	0.561859	1.00626	1.58719	Low
0.688656	0.120086	0.973124	1.84058	High
0.837048	0.701534	0.962844	1.46176	High
0.410917	0.84707	1.0168	1.43242	Low
0.96162	0.0344	0.939032	1.86038	High
0.0740829	0.72485	1.05614	1.42761	Low
0.297142	0.680016	1.02832	1.47682	Low
0.279269	0.834441	1.03269	1.4445	Low
0.138508	0.288332	1.04202	1.7429	Low
0.992341	0.176878	0.937147	1.82049	High
0.347917	0.662576	1.02189	1.5354	Low
0.206771	0.449887	1.03604	1.62311	Low
0.630075	0.471841	0.984942	1.5769	Low
0.35519	0.755964	1.02232	1.46166	Low
0.68974	0.0411144	0.971944	1.87601	High
0.752143	0.350183	0.968498	1.65438	High
0.0209959	0.128327	1.05394	1.80197	Low
0.897566	0.796656	0.956726	1.4402	High
0.33338	0.904435	1.02708	1.35755	Low
0.811915	0.563307	0.96407	1.53088	High
0.642222	0.824057	0.98825	1.39544	Low
0.86659	0.640378	0.958437	1.52947	High
0.653372	0.806323	0.986647	1.46314	Low
0.57448	0.0127261	0.985477	1.90472	Low
0.961361	0.570417	0.945989	1.58818	High
0.144403	0.326401	1.04184	1.67099	Low
0.306647	0.300505	1.02182	1.76532	Low
0.089437	0.543005	1.05163	1.5889	Low
0.0707091	0.163422	1.04843	1.78191	Low
0.189563	0.670842	1.04129	1.53232	Low
0.761596	0.760071	0.972822	1.42457	High
0.836486	0.295064	0.957548	1.71229	High
0.327601	0.604841	1.02355	1.48997	Low
0.844114	0.258096	0.956139	1.723	High
0.790799	0.716157	0.968674	1.45273	High
0.333841	0.281832	1.01826	1.69004	Low
0.629551	0.0816486	0.979753	1.83258	High
0.584708	0.334346	0.988584	1.69289	Low
0.612206	0.565076	0.988379	1.55821	Low
0.521702	0.772798	1.00225	1.40551	Low
0.639092	0.858327	0.9891	1.35123	Low
0.0820469	0.428977	1.05088	1.68108	Low
0.118572	0.611434	1.04908	1.56189	Low
0.385444	0.593858	1.01636	1.56859	Low
0.6484	0.949546	0.98921	1.36479	Low
0.19681	0.491962	1.03785	1.58843	Low
0.99011	0.179021	0.937445	1.78623	High
0.87662	0.513075	0.955541	1.54274	High
0.0846347	0.885586	1.0572	1.34084	Low
0.116008	0.171682	1.04307	1.75685	Low
0.0415694	0.907083	1.06277	1.36224	Low
0.481821	0.408645	1.00208	1.61341	Low
0.510218	0.972983	1.00643	1.3215	Low
0.940812	0.300099	0.944974	1.73266	High
0.31332	0.355517	1.02178	1.72173	Low
0.517095	0.147343	0.994231	1.83485	Low
0.756509	0.831922	0.974408	1.4143	High
0.661221	0.363593	0.979702	1.71942	High
0.667113	0.0467734	0.974751	1.82336	High
0.0394261	0.654057	1.05933	1.5134	Low
0.584475	0.713567	0.993781	1.44415	Low
0.457137	0.249455	1.00288	1.78957	Low
0.324363	0.251051	1.01898	1.72803	Low
0.174048	0.185555	1.03625	1.80766	Low
0.326116	0.573758	1.02329	1.59495	Low
0.753937	0.637003	0.972105	1.54596	High
0.838297	0.322853	0.957693	1.6815	High
0.0541052	0.40174	1.05388	1.66583	Low
0.457605	0.226073	1.0025	1.79517	Low
0.249514	0.179865	1.02704	1.7475	Low
0.627967	0.196664	0.981487	1.77976	Low
0.806484	0.15219	0.959304	1.79569	High
0.246808	0.922564	1.03792	1.34636	Low
0.353858	0.731688	1.02214	1.42062	Low
0.572442	0.612192	0.993858	1.51344	Low
0.747509	0.176878	0.966762	1.76331	High
0.899307	0.139346	0.947914	1.79405	High
0.10119	0.525124	1.04994	1.56236	Low
0.425934	0.315584	1.00757	1.73471	Low
0.971742	0.0181405	0.937602	1.8917	High
0.941082	0.175532	0.94333	1.82396	High
0.69833	0.222111	0.973313	1.78668	High
0.849452	0.469206	0.958264	1.64239	High
0.74338	0.507885	0.971663	1.57554	High
0.317284	0.534802	1.02382	1.54053	Low
0.431764	0.542596	1.01001	1.58095	Low
0.0575986	0.663188	1.05725	1.49478	Low
0.0387019	0.261889	1.05372	1.77022	Low
0.73818	0.568188	0.973101	1.57735	High
0.747643	0.666962	0.973273	1.52845	High
0.99119	0.867714	0.946232	1.38194	High
0.977009	0.625239	0.944799	1.49378	High
0.888649	0.478125	0.953621	1.59764	High
0.292645	0.66186	1.02861	1.47656	Low
0.456703	0.984723	1.01314	1.30228	Low
0.880741	0.612594	0.956349	1.55561	High
0.922642	0.397907	0.948447	1.70223	High
0.925904	0.807264	0.953408	1.39136	High
0.775934	0.661006	0.969748	1.49736	High
0.994517	0.76004	0.944421	1.42827	High
0.642996	0.538731	0.984278	1.58377	Low
0.199474	0.546524	1.0383	1.57181	Low
0.0562062	0.147031	1.04995	1.81158	Low
0.828091	0.360939	0.959431	1.71041	High
0.320997	0.430923	1.0219	1.62617	Low
0.482725	0.0702889	0.997335	1.84846	Low
0.174016	0.509645	1.04087	1.56837	Low
0.331493	0.682092	1.02416	1.53555	Low
0.634042	0.794192	0.98884	1.40956	Low
0.174995	0.768576	1.04447	1.46098	Low
0.0464519	0.694693	1.05907	1.46866	Low
0.0690175	0.45405	1.05282	1.64705	Low
0.994992	0.981489	0.947257	1.26304	High
0.683358	0.323156	0.976476	1.72749	High
0.252821	0.395683	1.02968	1.66996	Low
0.826909	0.0563442	0.955582	1.83859	High
0.515518	0.472123	0.998859	1.6608	Low
0.748958	0.713013	0.973731	1.51777	High
0.0644966	0.0194093	1.04712	1.89861	Low
0.122579	0.278035	1.0438	1.72756	Low
0.717108	0.296997	0.972037	1.76767	High
0.606607	0.933739	0.994102	1.36131	Low
0.567732	0.0702483	0.987067	1.87863	Low
0.437821	0.727438	1.01184	1.42869	Low
0.0240252	0.347833	1.05675	1.71619	Low
0.797114	0.043136	0.959006	1.86529	High
0.680995	0.804279	0.983249	1.43948	Low
0.705552	0.528055	0.97653	1.57966	High
0.944891	0.945678	0.952912	1.29457	High
0.21865	0.257337	1.03187	1.75889	Low
0.761252	0.924203	0.975072	1.3655	High
0.702285	0.328288	0.974251	1.67409	High
0.898623	0.930235	0.958364	1.37985	High
0.620146	0.251783	0.983175	1.76924	Low
0.911875	0.429839	0.95017	1.65492	High
0.850732	0.825307	0.96282	1.3692	High
0.686235	0.445171	0.977763	1.61209	High
0.427692	0.704455	1.01276	1.52064	Low
0.386839	0.0297677	1.00836	1.91356	Low
0.853463	0.258533	0.955013	1.71056	High
0.295062	0.9413	1.03229	1.3321	Low
0.219933	0.981977	1.04206	1.30908	Low
0.273928	0.963462	1.03519	1.37029	Low
0.943198	0.228629	0.94376	1.74852	High
0.99699	0.460865	0.940239	1.57795	High
0.365353	0.850696	1.02241	1.34516	Low
0.0912678	0.483255	1.05054	1.59508	Low
0.930681	0.877199	0.953746	1.40008	High
0.871893	0.563442	0.956778	1.53326	High
0.160163	0.658578	1.04469	1.47023	Low
0.741145	0.626788	0.973526	1.50392	High
0.849399	0.559118	0.959456	1.58201	High
0.891359	0.853506	0.958235	1.37923	High
0.725262	0.844774	0.978396	1.43201	High
0.292601	0.925854	1.03237	1.29853	Low
0.982445	0.790281	0.946288	1.45873	High
0.771786	0.489472	0.967966	1.62013	High
0.0434809	0.233472	1.05274	1.76529	Low
0.423445	0.236695	1.00678	1.76593	Low
0.0865755	0.731802	1.05472	1.49534	Low
0.569725	0.583258	0.993793	1.55283	Low
0.448579	0.799082	1.01153	1.45016	Low
0.709444	0.762349	0.979212	1.43196	High
0.401856	0.130015	1.00793	1.79438	Low
0.564364	0.613262	0.994856	1.4853	Low
0.761047	0.54833	0.970055	1.56291	High
0.92411	0.848625	0.954172	1.4016	High
0.658485	0.602756	0.983261	1.49953	Low
0.400758	0.0677962	1.0072	1.90892	Low
0.511538	0.585228	1.0009	1.58874	Low
0.964013	0.828734	0.94904	1.43926	High
0.660945	0.908787	0.98712	1.3927	Low
0.649196	0.901735	0.988459	1.37338	Low
0.260601	0.17075	1.02557	1.80288	Low
0.370698	0.854712	1.02182	1.35374	Low
0.225633	0.571094	1.03547	1.53777	Low
0.495218	0.182356	0.997353	1.79437	Low
0.496526	0.54694	1.0022	1.6136	Low
0.243028	0.15504	1.02748	1.80366	Low
0.959356	0.251883	0.942104	1.74637	High
0.158027	0.455424	1.04204	1.62254	Low
0.589425	0.872854	0.995364	1.39164	Low
0.996223	0.0212	0.934686	1.91509	High
0.314652	0.269419	1.02041	1.76204	Low
0.0529293	0.659036	1.05776	1.52526	Low
0.633753	0.0579931	0.978929	1.85775	High
0.468019	0.264833	1.00177	1.72493	Low
0.231353	0.0895307	1.02797	1.83921	Low
0.67153	0.870225	0.985301	1.36085	Low
0.895292	0.471811	0.952732	1.63965	High
0.199382	0.329412	1.03522	1.71047	Low
0.80647	0.77645	0.967569	1.38488	High
0.674932	0.847264	0.984573	1.39228	Low
0.736334	0.2034	0.968465	1.75328	High
0.830856	0.256556	0.957725	1.72161	High
0.534182	0.370202	0.995199	1.64464	Low
0.357485	0.832734	1.02312	1.35514	Low
0.378651	0.19406	1.01162	1.83179	Low
0.949899	0.997308	0.952981	1.32991	High
0.253307	0.407142	1.02978	1.64109	Low
0.421357	0.542175	1.01127	1.53652	Low
0.768422	0.735447	0.97166	1.49786	High
0.807902	0.0737706	0.958105	1.86305	High
0.711461	0.30365	0.97281	1.74435	High
0.641292	0.776328	0.987712	1.43558	Low
0.0343003	0.77306	1.06169	1.43879	Low
0.266239	0.51088	1.02968	1.54641	Low
0.450832	0.695301	1.00981	1.43353	Low
0.415612	0.331438	1.00904	1.74646	Low
0.488333	0.388707	1.00101	1.66064	Low
0.827644	0.963819	0.967488	1.30351	High
0.485184	0.131674	0.997875	1.82115	Low
0.916704	0.331104	0.948298	1.69235	High
0.0405257	0.816175	1.06157	1.41169	Low
0.966886	0.400929	0.943118	1.68519	High
0.75053	0.557606	0.971458	1.57115	High
0.401214	0.145646	1.00822	1.83841	Low
0.554069	0.75292	0.998028	1.44735	Low
0.520826	0.641786	1.00055	1.56168	Low
0.502643	0.216959	0.996927	1.72288	Low
0.0792527	0.541838	1.05285	1.56855	Low
0.95337	0.909571	0.951401	1.33585	High
0.46694	0.856109	1.01009	1.36004	Low
0.256731	0.0510357	1.02436	1.85909	Low
0.255491	0.512646	1.03101	1.60901	Low
0.358347	0.13842	1.0133	1.77341	Low
0.238577	0.699526	1.03573	1.48326	Low
0.985514	0.918186	0.947586	1.32305	High
0.355778	0.467347	1.01819	1.60357	Low
0.0138476	0.102672	1.05443	1.84219	Low
0.221427	0.838277	1.03981	1.37009	Low
0.330032	0.800941	1.02602	1.38477	Low
0.509713	0.230006	0.99625	1.8048	Low
0.633649	0.311381	0.982342	1.75527	Low
0.699773	0.773586	0.980543	1.43088	Low
0.478833	0.309092	1.00107	1.71038	Low
0.102851	0.105284	1.04372	1.81059	Low
0.166577	0.787178	1.04576	1.42455	Low
0.306895	0.0797856	1.0187	1.81326	Low
0.548307	0.940058	1.00131	1.35681	Low
0.541407	0.497317	0.99606	1.56585	Low
0.911523	0.980554	0.957453	1.3566	High
0.245616	0.454809	1.03139	1.64903	Low
0.900192	0.837879	0.95695	1.41681	High
0.521859	0.436992	0.997607	1.63586	Low
0.619639	0.278487	0.983597	1.71394	Low
0.0709762	0.986745	1.06035	1.27905	Low
0.748579	0.810385	0.975086	1.41786	High
0.52335	0.680387	1.00077	1.5168	Low
0.694188	0.112176	0.972351	1.81482	High
0.414234	0.596835	1.0129	1.51504	Low
0.712695	0.579339	0.97635	1.50771	High
0.59568	0.968832	0.99592	1.35962	Low
0.446497	0.0611646	1.00159	1.87629	Low
0.765329	0.401813	0.967585	1.65088	High
0.252222	0.461648	1.03069	1.654	Low
0.264294	0.554556	1.03054	1.53047	Low
0.120341	0.246008	1.04361	1.71443	Low
0.671598	0.980615	0.986798	1.35736	Low
0.301621	0.0189458	1.01849	1.88634	Low
0.391361	0.238197	1.01069	1.75512	Low
0.230734	0.833139	1.0386	1.43932	Low
0.182106	0.0952965	1.034	1.85482	Low
0.519498	0.524944	0.999101	1.56823	Low
0.345792	0.70218	1.02271	1.4588	Low
0.454914	0.269833	1.00343	1.75972	Low
0.7616	0.668244	0.971591	1.50383	High
0.554851	0.256863	0.99115	1.72805	Low
0.770073	0.178268	0.964051	1.74514	High
0.617481	0.297249	0.984111	1.72118	Low
0.389839	0.742527	1.0179	1.48042	Low
0.598047	0.633863	0.991038	1.52645	Low
0.428528	0.00082653	1.00293	1.9086	Low
0.907397	0.629931	0.953333	1.47775	High
0.731686	0.687324	0.97549	1.43834	High
0.152323	0.0683728	1.03721	1.82244	Low
0.571042	0.138156	0.987584	1.86132	Low
0.461058	0.625218	1.00759	1.49266	Low
0.724734	0.865234	0.978736	1.39493	High
0.482974	0.210413	0.999218	1.73588	Low
0.292817	0.950933	1.0327	1.32046	Low
0.274871	0.759637	1.03216	1.49294	Low
0.57326	0.669311	0.994541	1.53948	Low
0.269771	0.966813	1.03575	1.3238	Low
0.324457	0.197497	1.01822	1.80854	Low
0.422148	0.0919566	1.00495	1.88684	Low
0.75914	0.469469	0.969236	1.58499	High
0.494321	0.436907	1.00095	1.64726	Low
0.122071	0.226028	1.04312	1.75222	Low
0.19751	0.32789	1.03543	1.66311	Low
0.524682	0.328874	0.995786	1.67453	Low
0.0192114	0.98477	1.06665	1.26107	Low
0.0326037	0.0685368	1.05168	1.88883	Low
0.409274	0.313189	1.00956	1.69135	Low
0.20982	0.763528	1.04015	1.44108	Low
0.691026	0.284211	0.975026	1.68717	High
0.919804	0.402002	0.948845	1.61598	High
0.509113	0.272998	0.996909	1.73504	Low
0.678373	0.0907809	0.973977	1.84765	High
0.877879	0.0745428	0.949663	1.8776	High
0.366118	0.154817	1.01259	1.80407	Low
0.170602	0.489474	1.041	1.57284	Low
0.655954	0.423489	0.981148	1.62548	Low
0.745846	0.82115	0.975564	1.41604	High
0.38133	0.64423	1.01756	1.5158	Low
0.646342	0.570065	0.984295	1.5972	Low
0.52594	0.886445	1.00331	1.35159	Low
0.760199	0.704165	0.972242	1.47982	High
0.717581	0.733282	0.977827	1.47106	High
0.77695	0.934918	0.973297	1.29596	High
0.860522	0.721684	0.960251	1.51445	High
0.611831	0.385561	0.985989	1.69857	Low
0.706912	0.160642	0.971457	1.76997	High
0.000778048	0.712513	1.06489	1.46464	Low
0.505023	0.456467	0.999918	1.59467	Low
0.662808	0.969667	0.987723	1.28269	Low
0.186782	0.375274	1.0374	1.68912	Low
0.847872	0.103072	0.953659	1.85723	High
0.68366	0.844026	0.983464	1.37973	Low
0.980437	0.981551	0.949038	1.31913	High
0.902621	0.450597	0.951564	1.62303	High
0.863756	0.11484	0.951893	1.81087	High
0.819704	0.461012	0.961769	1.63139	High
0.846505	0.146455	0.95439	1.83823	High
0.477912	0.936337	1.00987	1.35888	Low
0.928713	0.400102	0.947739	1.61512	High
0.130304	0.492638	1.04594	1.5945	Low
0.150581	0.289142	1.04056	1.75829	Low
0.0702579	0.0192344	1.04642	1.91656	Low
0.487569	0.361242	1.00073	1.64281	Low
0.211205	0.734972	1.03957	1.45221	Low
0.138035	0.339711	1.04281	1.68987	Low
0.998512	0.44668	0.939871	1.60078	High
0.955676	0.682066	0.948137	1.50735	High
0.449129	0.51568	1.00752	1.64006	Low
0.247678	0.99786	1.03889	1.32038	Low
0.516482	0.121946	0.993959	1.77926	Low
0.162503	0.283114	1.03903	1.68382	Low
0.708027	0.95599	0.982008	1.31135	Low
0.464876	0.509884	1.00553	1.60062	Low
0.295472	0.342588	1.02376	1.64943	Low
0.0287037	0.806147	1.06286	1.44416	Low
0.742324	0.987407	0.97824	1.31317	High
0.236734	0.864172	1.03831	1.40972	Low
0.858763	0.595174	0.958793	1.56222	High
0.298541	0.944945	1.03191	1.36395	Low
0.74362	0.00601226	0.964976	1.86948	High
0.614567	0.927639	0.993045	1.29513	Low
0.610764	0.907853	0.993238	1.31277	Low
0.757146	0.387516	0.968388	1.68632	High
0.706016	0.162995	0.971596	1.79664	High
0.0168908	0.897888	1.06565	1.4106	Low
0.831064	0.539436	0.961425	1.55073	High
0.847131	0.79498	0.962856	1.44035	High
0.0184629	0.612227	1.06127	1.57459	Low
0.949831	0.741444	0.949626	1.50157	High
0.488309	0.986707	1.0093	1.26274	Low
0.0955559	0.850646	1.05535	1.38689	Low
0.387478	0.0178453	1.00812	1.89598	Low
0.733236	0.0803551	0.967211	1.87746	High
0.392589	0.69196	1.01686	1.53265	Low
0.573868	0.975	0.998673	1.27421	Low
0.0152152	0.624142	1.06184	1.48605	Low
0.900611	0.492061	0.952351	1.59744	High
0.0348339	0.161083	1.05274	1.82053	Low
0.115039	0.904837	1.05376	1.31615	Low
0.192975	0.128726	1.03316	1.81291	Low
0.918949	0.410696	0.949061	1.68252	High
0.165461	0.630789	1.04365	1.50067	Low
0.077179	0.467056	1.05202	1.65304	Low
0.620744	0.510659	0.986602	1.5554	Low
0.794786	0.675545	0.967647	1.46708	High
0.962517	0.268645	0.941938	1.73575	High
0.186011	0.356398	1.03723	1.67057	Low
0.257138	0.314528	1.02801	1.6856	Low
0.686197	0.513665	0.978689	1.63255	High
0.95824	0.098249	0.94026	1.83679	High
0.790099	0.141143	0.96114	1.86513	High
0.566743	0.364637	0.991174	1.72936	Low
0.950876	0.900096	0.951581	1.35368	High
0.381104	0.422213	1.01449	1.65516	Low
0.9694	0.771735	0.947637	1.39662	High
0.573377	0.717073	0.995182	1.49195	Low
0.780308	0.80593	0.971155	1.40964	High
0.966251	0.823874	0.948703	1.44366	High
0.41389	0.702631	1.01441	1.5084	Low
0.427037	0.355963	1.008	1.70832	Low
0.888568	0.595806	0.955176	1.51536	High
0.567219	0.226138	0.989236	1.71659	Low
0.910534	0.693942	0.953792	1.46801	High
0.494871	0.94533	1.00792	1.31453	Low
0.632956	0.959	0.991227	1.3119	Low
0.649535	0.352423	0.980969	1.66807	Low
0.421583	0.333985	1.00835	1.68525	Low
0.265303	0.162151	1.02488	1.78715	Low
0.394907	0.185189	1.00953	1.8233	Low
0.867313	0.104403	0.951327	1.8232	High
0.0860724	0.620793	1.05317	1.50594	Low
0.831291	0.610518	0.962339	1.50663	High
0.775733	0.13863	0.962844	1.81596	High
0.926694	0.182895	0.945166	1.83418	High
0.235372	0.593754	1.03461	1.5766	Low
0.924096	0.958883	0.955629	1.32446	High
0.221349	0.677646	1.03752	1.47646	Low
0.169274	0.552114	1.04206	1.61036	Low
0.448992	0.256824	1.00397	1.74222	Low
0.389849	0.0950732	1.00889	1.87454	Low
0.890769	0.539987	0.954175	1.57145	High
0.107984	0.303339	1.04593	1.71347	Low
0.981504	0.406915	0.941422	1.61292	High
0.885458	0.993842	0.960818	1.29852	High
0.20857	0.180549	1.032	1.79557	Low
0.938046	0.417101	0.946827	1.646	High
0.721948	0.796689	0.97815	1.46954	High
0.337382	0.671145	1.02329	1.54045	Low
0.351144	0.870478	1.02443	1.36548	Low
0.434686	0.790835	1.01311	1.4124	Low
0.633147	0.460268	0.984413	1.6217	Low
0.214988	0.818197	1.04031	1.4285	Low
0.271779	0.120742	1.02352	1.85058	Low
0.964486	0.421333	0.943673	1.61454	High
0.817433	0.662195	0.964711	1.45743	High
0.110497	0.137339	1.04325	1.78919	Low
0.849452	0.837481	0.963138	1.37009	High
0.41059	0.101512	1.00648	1.80688	Low
0.883081	0.473579	0.954238	1.58178	High
0.188805	0.90645	1.04477	1.36152	Low
0.306959	0.984998	1.03146	1.30656	Low
0.368152	0.0600789	1.01103	1.91132	Low
0.106735	0.500277	1.04891	1.62021	Low
0.371074	0.741216	1.02017	1.43577	Low
0.298921	0.477557	1.02524	1.64311	Low
0.0585873	0.181644	1.05016	1.80223	Low
0.379913	0.788596	1.01976	1.38945	Low
0.82619	0.100441	0.956244	1.81741	High
0.138869	0.413844	1.04377	1.6396	Low
0.180781	0.455525	1.03928	1.67097	Low
0.397699	0.268995	1.01035	1.70163	Low
0.554224	0.19952	0.990448	1.74634	Low
0.983826	0.101428	0.93721	1.80785	High
0.581341	0.377349	0.989576	1.64724	Low
0.942502	0.297912	0.944741	1.75824	High
0.470341	0.00330635	0.997917	1.94775	Low
0.615288	0.521434	0.987411	1.63504	Low
0.849651	0.61047	0.960104	1.54865	High
0.00221376	0.463824	1.06108	1.64138	Low
0.547064	0.841582	1.0001	1.38814	Low
0.25095	0.522858	1.03171	1.62372	Low
0.718213	0.526567	0.974971	1.62976	High
0.45389	0.316205	1.00419	1.74669	Low
0.0222891	0.736888	1.06263	1.46738	Low
0.700639	0.495363	0.976688	1.57762	High
0.77004	0.424222	0.967311	1.64564	High
0.0993897	0.0741801	1.04369	1.81803	Low
0.738985	0.358417	0.970203	1.66121	High
0.369458	0.376678	1.01527	1.65694	Low
0.800006	0.820128	0.968941	1.37523	High
0.634096	0.852787	0.989634	1.3479	Low
0.649661	0.499548	0.982938	1.62312	Low
0.348394	0.0816067	1.01372	1.81701	Low
0.478052	0.837501	1.00847	1.43704	Low
0.403792	0.549822	1.01351	1.52458	Low
0.650074	0.565207	0.983775	1.60927	Low
0.785992	0.775452	0.970053	1.43168	High
0.688809	0.822334	0.982541	1.43779	Low
0.0411191	0.61241	1.05851	1.5133	Low
0.847229	0.491082	0.958823	1.62422	High
0.375131	0.221816	1.01243	1.74917	Low
0.76445	0.041572	0.96293	1.89205	High
0.236629	0.865419	1.03834	1.36186	Low
0.580843	0.258767	0.988029	1.76922	Low
0.881295	0.589915	0.955983	1.51683	High
0.874533	0.349757	0.953653	1.64742	High
0.910662	0.285376	0.948435	1.70008	High
0.0690284	0.792356	1.05774	1.37874	Low
0.292676	0.724332	1.02949	1.45254	Low
0.0653549	0.701191	1.05686	1.50762	Low
0.0683216	0.829801	1.05837	1.434	Low
0.755025	0.0491246	0.964167	1.82626	High
0.81175	0.592671	0.964479	1.57105	High
0.133995	0.563946	1.04652	1.54112	Low
0.421701	0.924604	1.01657	1.31288	Low
0.220839	0.630692	1.03691	1.55142	Low
0.234812	0.464907	1.03285	1.60488	Low
0.92271	0.668087	0.951969	1.5386	High
0.78258	0.0147619	0.960389	1.90291	High
0.676328	0.527294	0.980072	1.62427	Low
0.687815	0.514397	0.978502	1.54545	High
0.471076	0.435294	1.00375	1.59277	Low
0.250568	0.44477	1.03065	1.67612	Low
0.645773	0.519127	0.983675	1.60976	Low
0.282833	0.602043	1.02896	1.53875	Low
0.770266	0.479941	0.968024	1.66013	High
0.0248	0.25947	1.05537	1.70617	Low
0.151092	0.245362	1.03988	1.78469	Low
0.932447	0.513928	0.948768	1.61462	High
0.475183	0.815502	1.00852	1.44665	Low
0.798928	0.319239	0.962417	1.70922	High
0.167355	0.214273	1.03747	1.76775	Low
0.721334	0.60304	0.975618	1.50773	High
0.55257	0.509164	0.994865	1.64439	Low
0.870886	0.0662415	0.950399	1.89775	High
0.375249	0.653926	1.01844	1.49501	Low
0.625946	0.596588	0.987136	1.58065	Low
0.965039	0.551481	0.945296	1.58624	High
0.259214	0.393467	1.02887	1.68543	Low
0.505315	0.115574	0.995222	1.84691	Low
0.96465	0.974419	0.950875	1.27544	High
0.36551	0.287724	1.01451	1.73084	Low
0.758353	0.501877	0.969763	1.56782	High
0.664743	0.0431273	0.974989	1.85339	High
0.735122	0.960104	0.978751	1.34431	High
0.507903	0.707741	1.00303	1.43757	Low
0.697617	0.975029	0.98354	1.36334	Low
0.600982	0.0142705	0.9823	1.84725	Low
0.120754	0.929758	1.05343	1.31813	Low
0.967297	0.685172	0.946762	1.46755	High
0.800265	0.357042	0.962754	1.67093	High
0.412443	0.139516	1.00678	1.80874	Low
0.338429	0.925661	1.02676	1.38638	Low
0.344706	0.824441	1.02456	1.42733	Low
0.707105	0.523614	0.976282	1.54546	High
0.8017	0.480055	0.964207	1.65986	High
0.19976	0.107162	1.03203	1.83634	Low
0.117401	0.638826	1.04961	1.51993	Low
0.992204	0.745346	0.944512	1.46312	High
0.795417	0.91587	0.970785	1.36485	High
0.989433	0.670352	0.943873	1.50268	High
0.782234	0.331639	0.964605	1.66185	High
0.753747	0.93176	0.976091	1.36942	High
0.690551	0.846199	0.982652	1.43593	Low
0.632733	0.166049	0.9805	1.79791	Low
0.378425	0.479118	1.01561	1.6583	Low
0.903119	0.0343735	0.946094	1.83071	High
0.294696	0.972516	1.03278	1.27632	Low
0.933521	0.313927	0.946036	1.67797	High
0.837037	0.511594	0.960331	1.57149	High
0.157915	0.342022	1.04043	1.68858	Low
0.691436	0.938667	0.983801	1.36158	Low
0.0786684	0.640755	1.05436	1.52307	Low
0.185549	0.745206	1.04285	1.41259	Low
0.934907	0.168027	0.94398	1.84901	High
0.674294	0.871203	0.984977	1.40349	Low
0.027467	0.0639775	1.05223	1.8798	Low
0.606616	0.772091	0.991883	1.43578	Low
0.968769	0.893869	0.949313	1.39788	High
0.31692	0.903772	1.02908	1.38033	Low
0.938065	0.0411668	0.941963	1.85917	High
0.215154	0.18922	1.03133	1.79123	Low
0.0993426	0.692602	1.05259	1.44996	Low
0.663268	0.709451	0.984124	1.49917	Low
0.174362	0.997375	1.04785	1.25779	Low
0.53804	0.121554	0.991348	1.86418	Low
0.866442	0.733601	0.959687	1.46822	High
0.932602	0.340838	0.946497	1.64842	High
0.267746	0.897238	1.035	1.39311	Low
0.675284	0.338448	0.97766	1.64918	High
0.144447	0.344628	1.0421	1.64931	Low
0.452247	0.0417577	1.00063	1.88574	Low
0.97767	0.0153013	0.93685	1.93904	High
0.198056	0.381756	1.03613	1.63483	Low
0.186014	0.657971	1.04154	1.51061	Low
0.637955	0.0826808	0.978752	1.81161	High
0.175861	0.555904	1.04131	1.58759	Low
0.444001	0.464411	1.00744	1.61879	Low
0.921489	0.433496	0.94905	1.66106	High
0.953319	0.956521	0.952025	1.35736	High
0.92266	0.208279	0.945982	1.77981	High
0.31216	0.455426	1.02332	1.59616	Low
0.420561	0.225089	1.00697	1.72858	Low
0.180915	0.0221857	1.03311	1.90571	Low
0.941935	0.987327	0.953823	1.31279	High
0.490951	0.703174	1.00503	1.52079	Low
0.827366	0.337667	0.959213	1.69143	High
0.202839	0.908255	1.04308	1.3637	Low
0.906579	0.0176921	0.945461	1.8484	High
0.730852	0.215367	0.969287	1.7879	High
0.985199	0.703215	0.944817	1.52081	High
0.053062	0.402711	1.05402	1.62646	Low
0.447565	0.709516	1.01041	1.51674	Low
0.591197	0.599207	0.991399	1.49369	Low
0.910857	0.199199	0.947293	1.77573	High
0.892208	0.497756	0.953446	1.64646	High
0.970138	0.801449	0.947935	1.4412	High
0.119156	0.0345355	1.04074	1.88023	Low
0.902524	0.145133	0.9476	1.85974	High
0.242749	0.490665	1.03225	1.5786	Low
0.165125	0.667559	1.04422	1.48673	Low
0.83088	0.0972261	0.955636	1.85792	High
0.362244	0.115891	1.01252	1.87797	Low
0.994863	0.754708	0.944309	1.4665	High
0.340149	0.482493	1.0203	1.61443	Low
0.916641	0.209829	0.946731	1.72817	High
0.838917	0.32078	0.957591	1.75037	High
0.0420005	0.0675715	1.05053	1.88803	Low
0.129446	0.491234	1.04602	1.59767	Low
0.535706	0.478237	0.996491	1.62223	Low
0.746751	0.196158	0.967109	1.80999	High
0.316437	0.765831	1.02718	1.46264	Low
0.101942	0.466896	1.04901	1.59938	Low
0.157175	0.580065	1.04393	1.5909	Low
0.288596	0.395221	1.02534	1.63105	Low
0.782408	0.762877	0.970322	1.40413	High
0.501318	0.984397	1.00768	1.34689	Low
0.628466	0.199361	0.981463	1.80402	Low
0.37163	0.425922	1.01569	1.61462	Low
0.352675	0.0803411	1.01318	1.82501	Low
0.20676	0.917112	1.04273	1.33399	Low
0.317477	0.317235	1.02074	1.70591	Low
0.201464	0.468378	1.03695	1.64902	Low
0.850133	0.0363945	0.952517	1.89998	High
0.451818	0.389095	1.00545	1.62158	Low
0.824596	0.842252	0.966236	1.4374	High
0.996396	0.804019	0.944765	1.46755	High
0.581543	0.664762	0.99347	1.54757	Low
0.190005	0.00487231	1.03177	1.88632	Low
0.812072	0.124258	0.958262	1.8609	High
0.444465	0.923313	1.01377	1.34984	Low
0.852397	0.751151	0.961632	1.48084	High
0.564792	0.326463	0.990892	1.71858	Low
0.999256	0.64622	0.942364	1.48254	High
0.654776	0.300503	0.979636	1.72505	High
0.723104	0.276298	0.971035	1.77088	High
0.639601	0.35197	0.982168	1.66117	Low
0.163294	0.667102	1.04443	1.53931	Low
0.707883	0.539368	0.976398	1.56983	High
0.670533	0.462704	0.979906	1.58988	High
0.676701	0.64513	0.981617	1.47603	Low
0.874604	0.390764	0.954182	1.66477	High
0.986595	0.0391216	0.936078	1.90084	High
0.728598	0.998298	0.980066	1.33656	Low
0.225749	0.46875	1.034	1.57044	Low
0.967934	0.953912	0.950204	1.32332	High
0.153612	0.160713	1.03837	1.81932	Low
0.374187	0.0618035	1.01033	1.82004	Low
0.0150208	0.290061	1.057	1.70518	Low
0.769878	0.278716	0.965402	1.71191	High
0.995527	0.825217	0.945148	1.44004	High
0.449075	0.233335	1.00364	1.76844	Low
0.982367	0.0901108	0.937241	1.8322	High
0.262495	0.69356	1.03273	1.49606	Low
0.58763	0.391877	0.989011	1.63982	Low
0.462261	0.882988	1.01103	1.37142	Low
0.26808	0.684297	1.03192	1.46904	Low
0.161614	0.772137	1.04615	1.48616	Low
0.428705	0.109923	1.0044	1.80038	Low
0.576152	0.389677	0.990373	1.6239	Low
0.197736	0.486199	1.03765	1.59515	Low
0.405234	0.554582	1.0134	1.55161	Low
0.273719	0.618711	1.0303	1.48396	Low
0.195786	0.767984	1.04193	1.4466	Low
0.813643	0.937512	0.968847	1.31662	High
0.620382	0.797562	0.990553	1.38294	Low
0.299923	0.980411	1.03225	1.28324	Low
0.0318103	0.997025	1.06529	1.29944	Low
0.167765	0.100321	1.0358	1.84274	Low
0.0813402	0.0755872	1.04589	1.85114	Low
0.848826	0.0988423	0.953488	1.79744	High
0.143732	0.562994	1.04532	1.61115	Low
0.768562	0.433427	0.967612	1.67077	High
0.354147	0.531706	1.01929	1.60203	Low
0.113551	0.77006	1.05198	1.3956	Low
0.474994	0.754751	1.00769	1.48262	Low
0.998925	0.620125	0.942065	1.55969	High
0.337287	0.596739	1.02226	1.49802	Low
0.701102	0.81889	0.980994	1.38884	Low
0.746994	0.589486	0.972314	1.55163	High
0.982613	0.883353	0.947484	1.34995	High
0.813915	0.442882	0.962232	1.63684	High
0.0949467	0.469749	1.0499	1.59176	Low
0.459183	0.587518	1.0073	1.57889	Low
0.451441	0.209402	1.00302	1.79647	Low
0.649775	0.265622	0.979774	1.77397	High
0.64339	0.0745091	0.977986	1.82607	High
0.972173	0.637843	0.945552	1.53391	High
0.00427428	0.0317117	1.05457	1.93046	Low
0.734886	0.129776	0.967665	1.84891	High
0.874425	0.612362	0.957114	1.53107	High
0.823857	0.0450196	0.955802	1.86003	High
0.965643	0.52886	0.944928	1.58048	High
0.0112915	0.801346	1.06491	1.39754	Low
0.484073	0.610077	1.00458	1.55081	Low
0.900665	0.861835	0.957209	1.3517	High
0.438137	0.297454	1.00584	1.69495	Low
0.418263	0.400105	1.00967	1.64376	Low
0.903471	0.551486	0.952781	1.53768	High
0.497043	0.94185	1.00761	1.29768	Low
0.668206	0.737838	0.983907	1.49627	Low
0.943781	0.714986	0.950017	1.47645	High
0.819707	0.646537	0.964226	1.55424	High
0.924623	0.436135	0.948704	1.60192	High
0.358202	0.49318	1.01826	1.6514	Low
0.707677	0.427111	0.974918	1.61585	High
0.652571	0.537614	0.983099	1.6019	Low
0.0128652	0.547815	1.06101	1.59075	Low
0.856072	0.926582	0.963516	1.36989	High
0.367429	0.632411	1.01909	1.55976	Low
0.948264	0.670443	0.948888	1.53853	High
0.870832	0.192707	0.952051	1.79741	High
0.54136	0.962792	1.00248	1.30906	Low
0.369054	0.216171	1.01308	1.74906	Low
0.0326539	0.91978	1.06405	1.31657	Low
0.912036	0.558757	0.951835	1.52899	High
0.00879044	0.231389	1.0569	1.73454	Low
0.573792	0.872095	0.997262	1.37935	Low
0.795514	0.226406	0.961607	1.80131	High
0.808216	0.529773	0.964075	1.62706	High
0.694616	0.25051	0.974141	1.79521	High
0.482523	0.842704	1.008	1.37722	Low
0.0372055	0.297003	1.05441	1.67983	Low
0.117342	0.455429	1.04698	1.59096	Low
0.984574	0.47537	0.941934	1.57875	High
0.507179	0.858541	1.00521	1.41387	Low
0.414291	0.0444175	1.00525	1.8588	Low
0.81101	0.0614143	0.957568	1.88828	High
0.0289602	0.568462	1.05935	1.53044	Low
0.660063	0.751014	0.985079	1.49039	Low
0.595456	0.533838	0.98999	1.59337	Low
0.200838	0.452535	1.0368	1.59839	Low
0.808382	0.165057	0.959244	1.83488	High
0.831887	0.165309	0.956404	1.75974	High
0.350375	0.560275	1.02015	1.60755	Low
0.485221	0.449524	1.00223	1.60895	Low
0.150328	0.930726	1.04983	1.3452	Low
0.746693	0.899892	0.976523	1.36152	High
0.980038	0.0387834	0.936865	1.88784	High
0.505438	0.158814	0.995796	1.75879	Low
0.00616452	0.42634	1.06005	1.6282	Low
0.748587	0.296506	0.968216	1.75099	High
0.0991055	0.330659	1.0474	1.74249	Low
0.253838	0.981267	1.0379	1.287	Low
0.760109	0.600072	0.97086	1.53344	High
0.196311	0.714596	1.0411	1.42728	Low
0.937341	0.999909	0.954551	1.34945	High
0.498682	0.669816	1.00363	1.52244	Low
0.105652	0.637642	1.05103	1.47974	Low
0.844707	0.87207	0.964178	1.3419	High
0.466694	0.423667	1.00412	1.62211	Low
0.834348	0.288402	0.95772	1.70656	High
0.937304	0.442476	0.947247	1.67624	High
0.995466	0.272008	0.93799	1.77867	High
0.970505	0.237709	0.940572	1.72578	High
0.829081	0.607987	0.962574	1.50481	High
0.230831	0.307692	1.0311	1.73076	Low
0.489595	0.0938726	0.996826	1.85343	Low
0.954509	0.059215	0.940209	1.86291	High
0.0869049	0.227718	1.0474	1.7701	Low
