# Supplementary material
Source: Research Square preprint supplement (doi:10.21203/rs.3.rs-9926562/v1)
Supplement: Supplementary file 3 [file 92987e209170864bd8fda12c.xlsx]

## Sheet: Sheet1
Chemical Composition	Tolerance Factor (t)	Predicted Bandgap (eV)	Stability Status
Cs(0.93)MA(0.07)Sn(0.88)Ge(0.12)I3	0.953746	1.40008	High
Cs(0.92)MA(0.08)Sn(0.85)Ge(0.15)I3	0.954172	1.4016	High
Cs(0.74)MA(0.26)Sn(0.77)Ge(0.23)I3	0.9755	1.4017	High
Cs(0.97)MA(0.03)Sn(0.89)Ge(0.11)I3	0.949313	1.39788	High
Cs(0.97)MA(0.03)Sn(0.77)Ge(0.23)I3	0.947637	1.39662	High
Cs(0.78)MA(0.22)Sn(0.76)Ge(0.24)I3	0.970322	1.40413	High
Cs(0.72)MA(0.28)Sn(0.87)Ge(0.13)I3	0.978736	1.39493	High
Cs(0.76)MA(0.24)Sn(0.85)Ge(0.15)I3	0.974507	1.40746	High
Cs(0.93)MA(0.07)Sn(0.81)Ge(0.19)I3	0.953408	1.39136	High
Cs(0.78)MA(0.22)Sn(0.81)Ge(0.19)I3	0.971155	1.40964	High
